# Supplementary material
Source: ML conference proceedings conference paper supplement (https://openreview.net/forum?id=saNgDizIODl)

Raw data

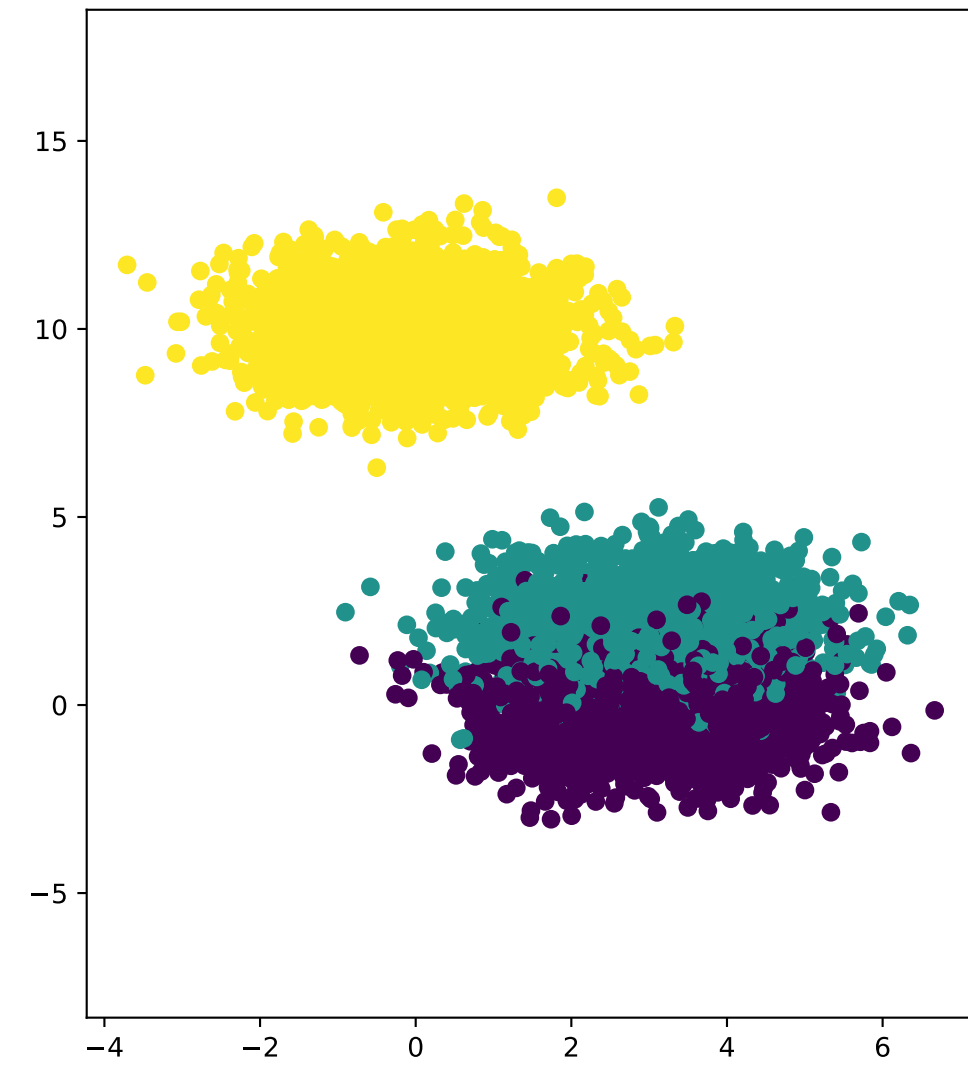

Classification

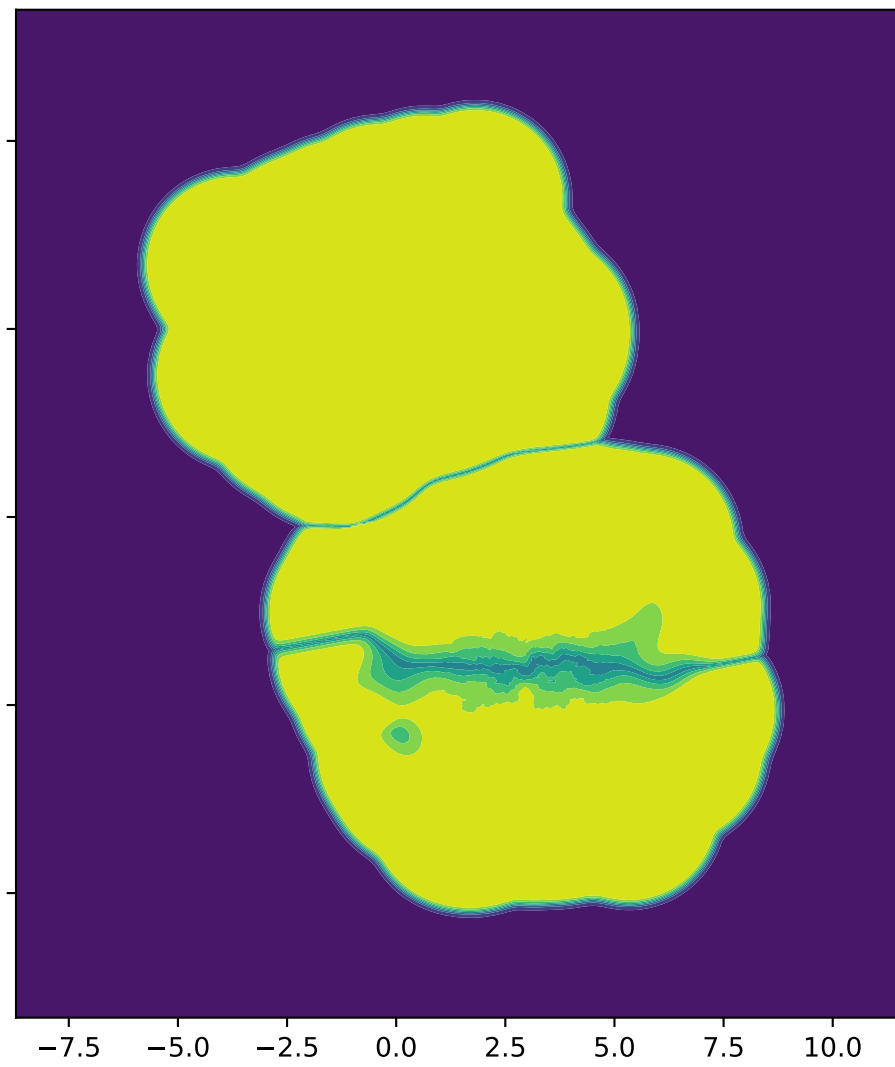

Uncertainty aleatoric, ISJ

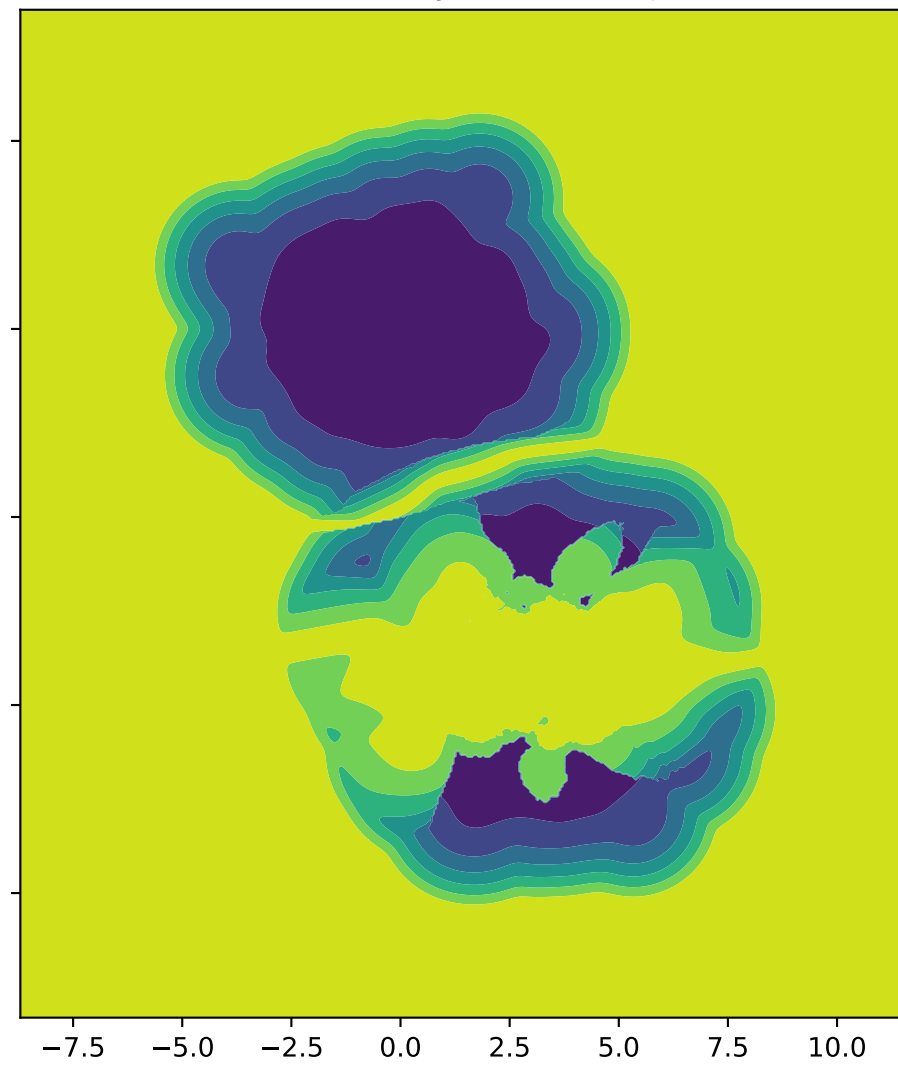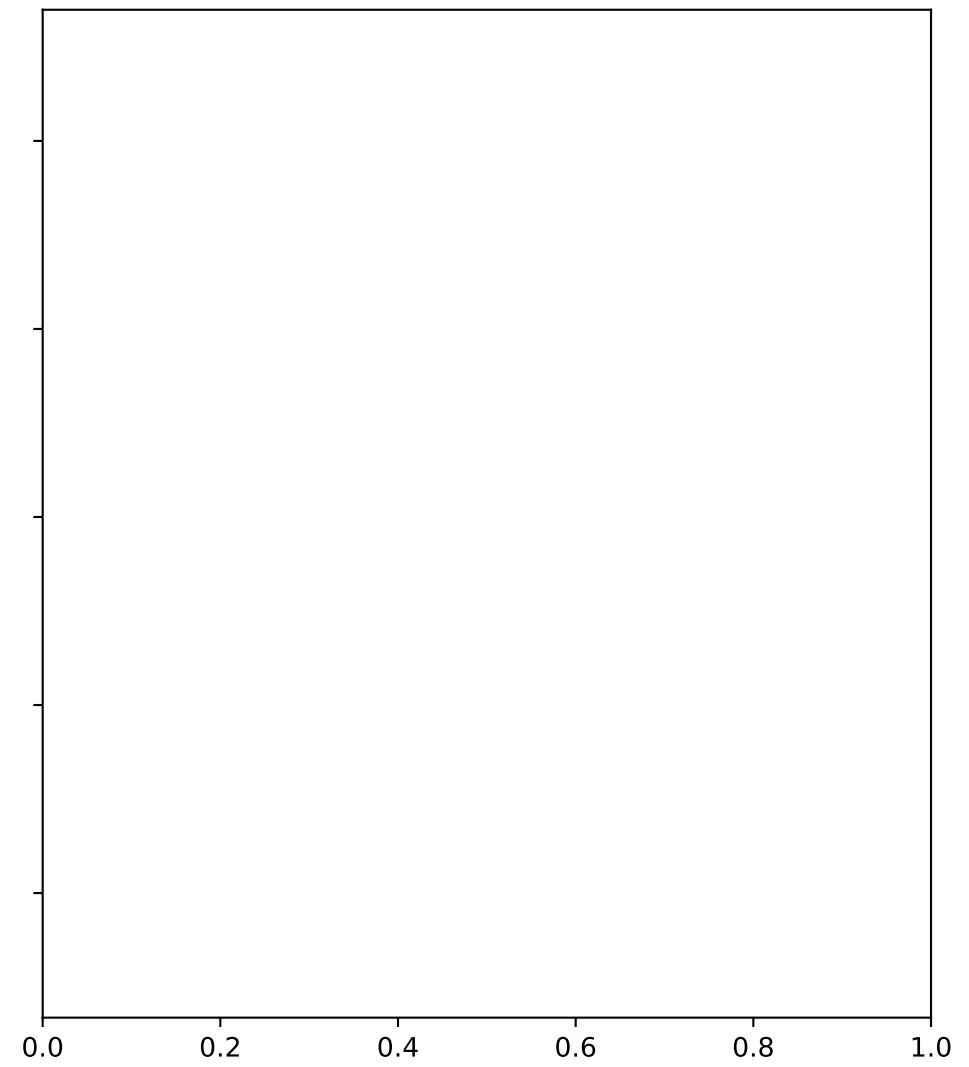

Supplement: supplementary_material [file attachment]

Raw data

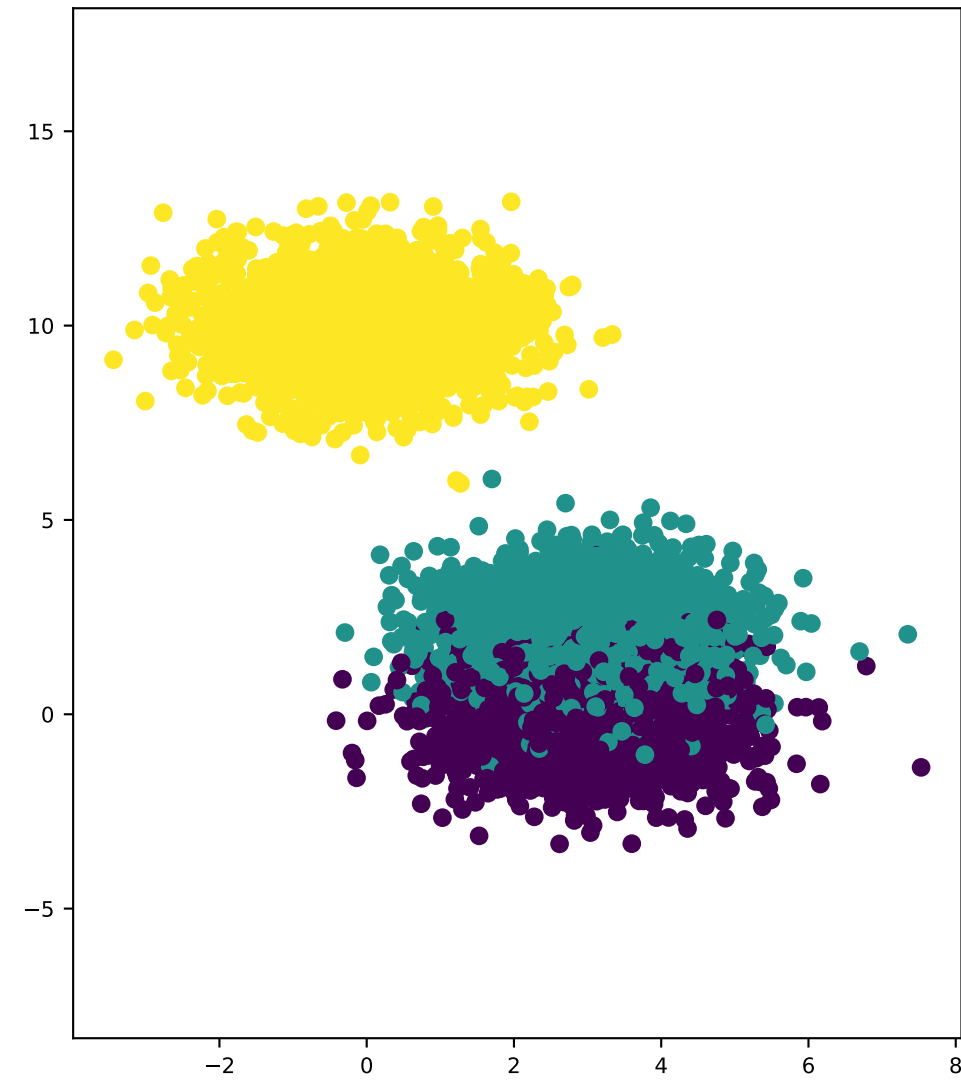

Classification

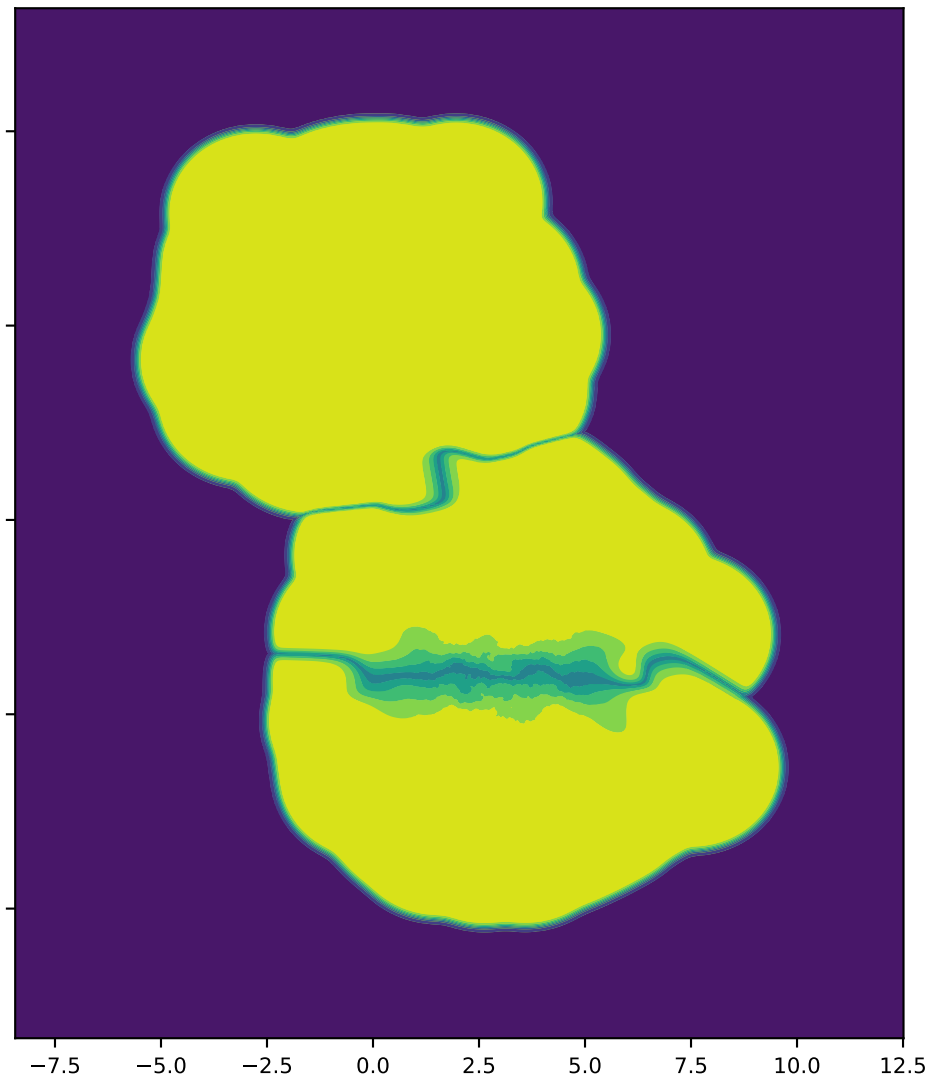

Uncertainty aleatoric, ISJ

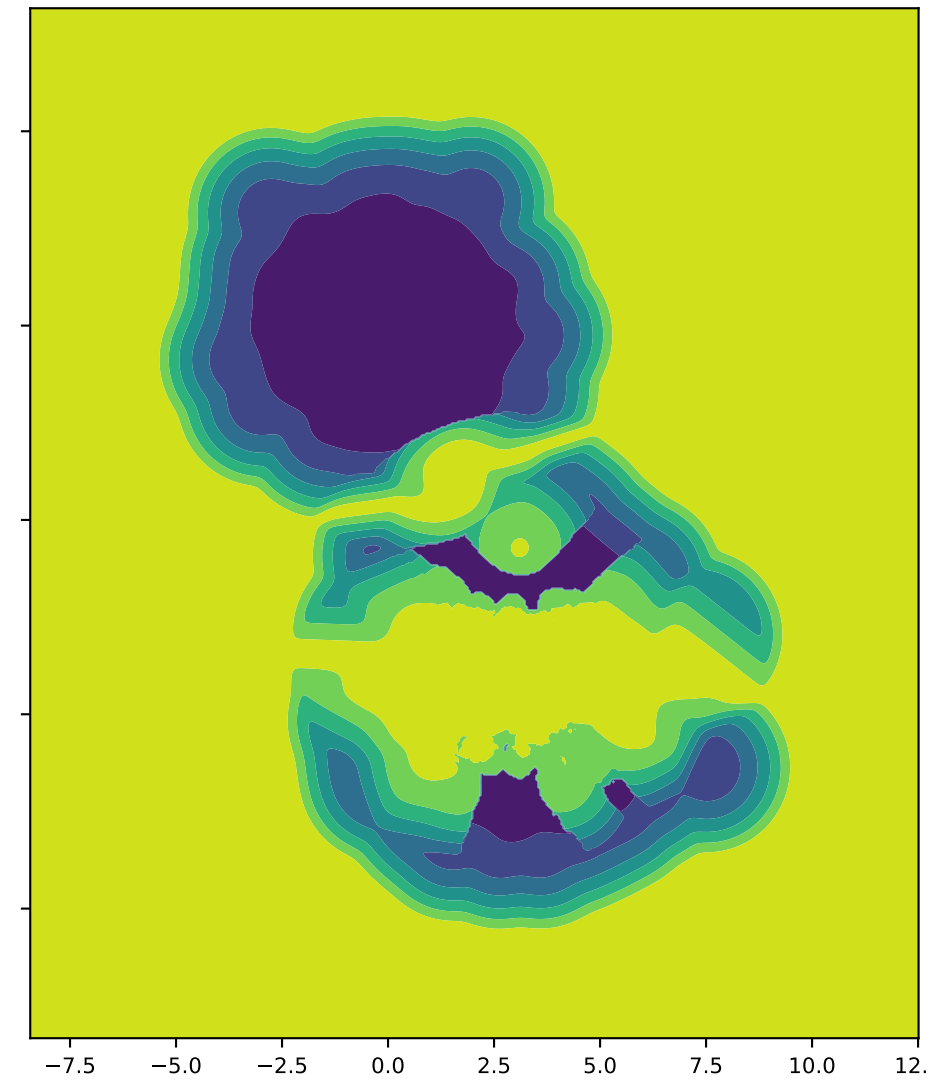

Uncertainty aleatoric, Classification

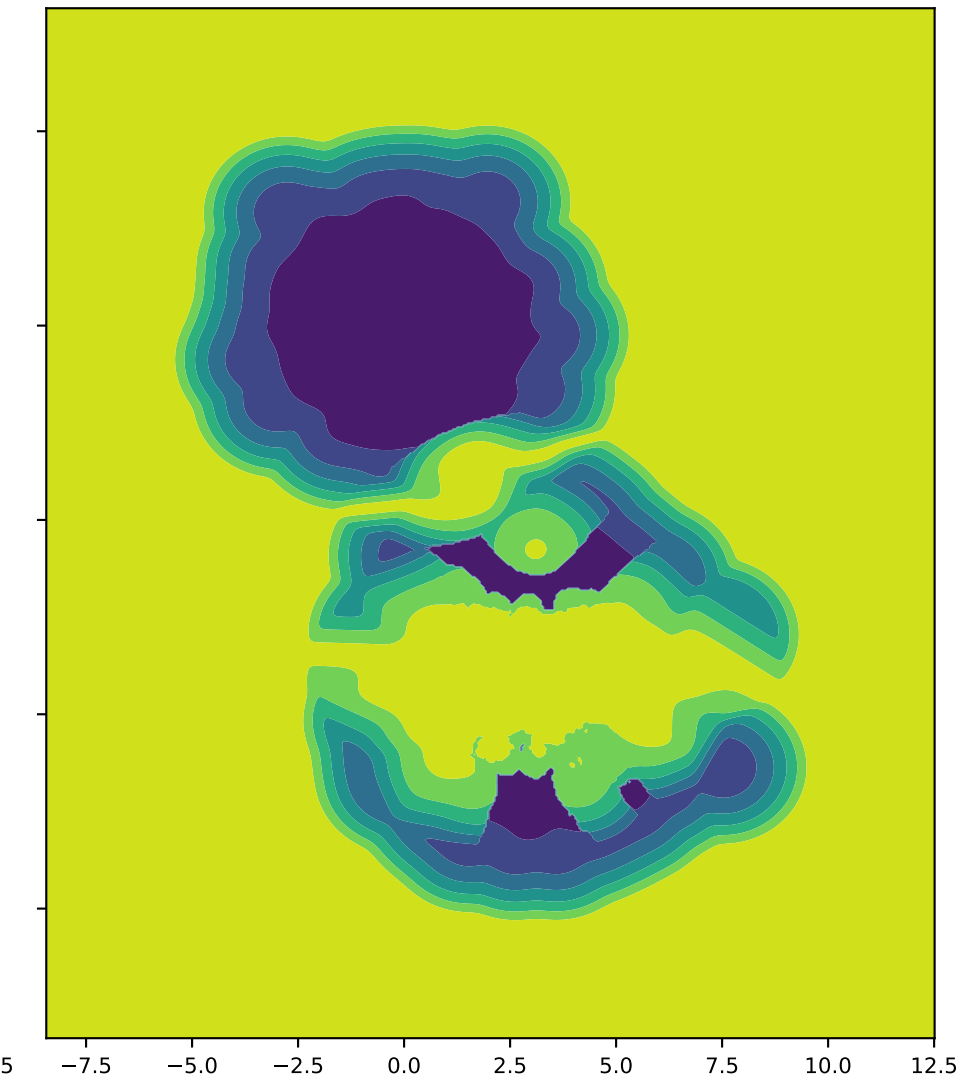

Supplement: supplementary_material [file attachment]
